# Supplementary material for: Anthropogenic and natural controls on atmospheric δ 13 C-CO 2 variations in the Yangtze River delta: insights from a carbon isotope modeling framework
Source: Copernicus journal article supplement (doi:10.5194/acp-21-10015-2021), 2021-07-06
Supplement: Supplementary file 1 [file acp-21-10015-2021-supplement.pdf]

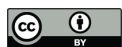

*Supplement of*

## **Anthropogenic and natural controls on atmospheric $\delta^{13}\text{C}$ -CO<sub>2</sub> variations in the Yangtze River delta: insights from a carbon isotope modeling framework**

**Cheng Hu et al.**

*Correspondence to:* Cheng Hu (nihaohucheng@163.com, huxxx991@umn.edu) and Timothy J. Griffis (timgriffis@umn.edu)

The copyright of individual parts of the supplement might differ from the article licence.

**This document includes 2 tables and 4 figures:**

Method to derive  $\delta^{13}\text{C-CO}_2$  background

$$\delta_a^{13} \times C_a = \delta_s \times (C_a - C_b) + \delta_b \times C_b$$

The  $\delta_b$  background can be calculated based on above equation, here only  $C_b$  is not observed and with low bias as assessed before,  $\delta_s$  is the mixture of end-members by regional sources and it can be derived by independent Miller-Tans and keeling plots regressions approaches at monthly intervals, the nighttime (22:00-08:00)  $\delta_s$  will be used for these 2 approaches, see details of  $\delta_s$  calculations in Xu et al. (2017).  $C_a$  and  $\delta_a^{13}$  are observed atmospheric  $\text{CO}_2$  mixing ratio and  $^{13}\text{C}/^{12}\text{C}$  ratio.

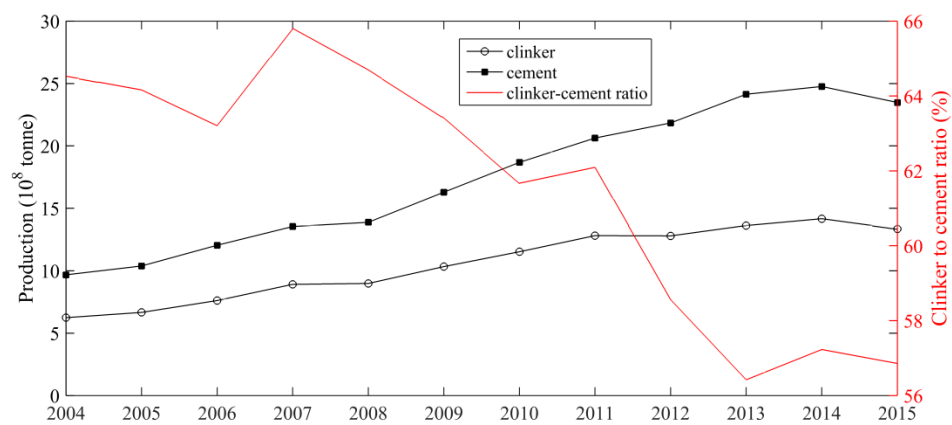

Figure S1. Annual productions of clinker and cement and their ratios in China.

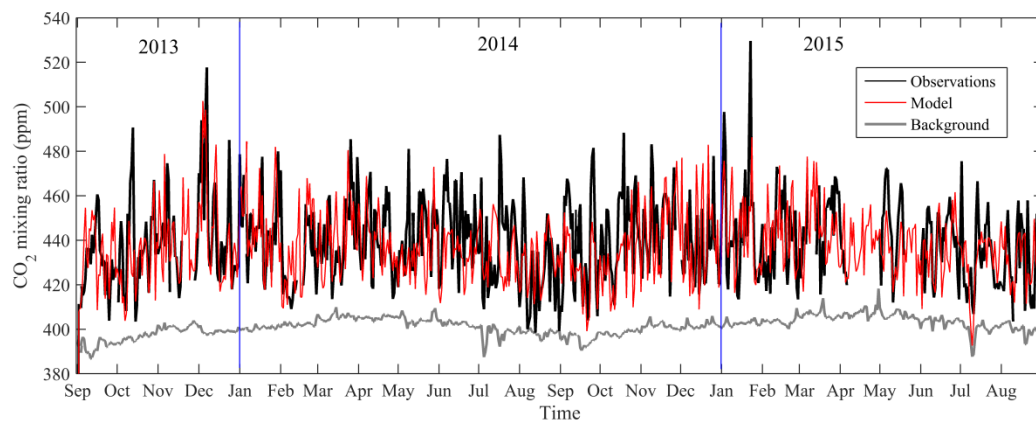

Figure S2. Daily comparisons of CO<sub>2</sub> mixing ratios.

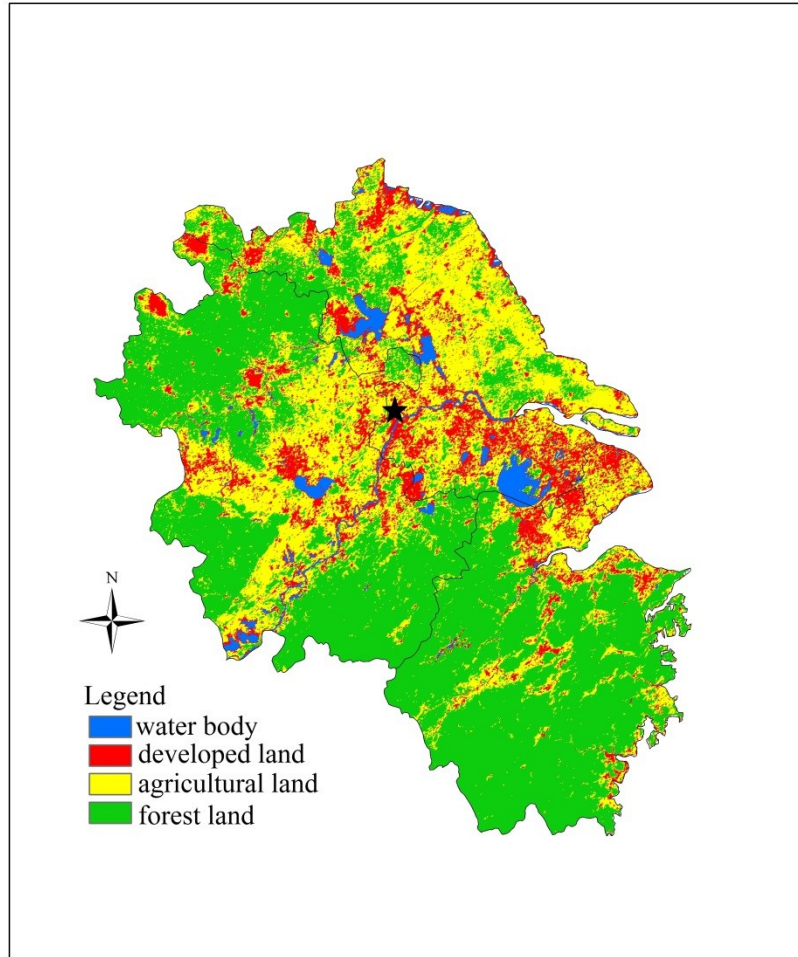

Figure S3. Land-Use and Land-Cover classification in Yangtze River Delta for 2014 was applied by using NDVI data of MOD13A2, “\*” indicate observation site.

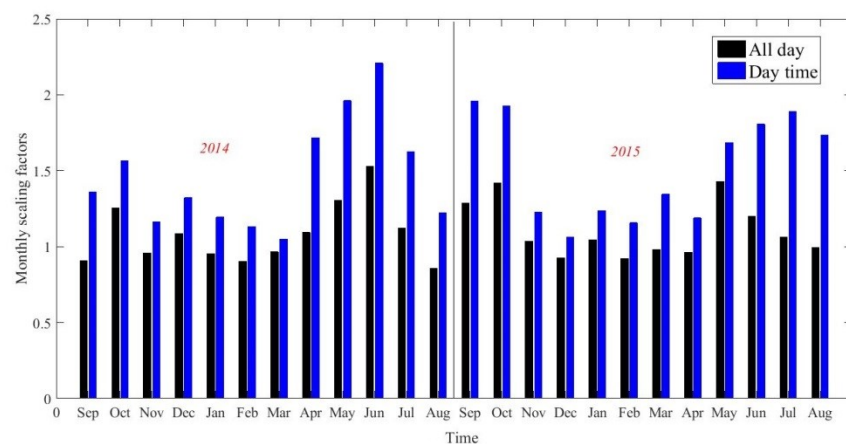

Figure S4. Derived monthly scaling factors for all-day and only daytime.

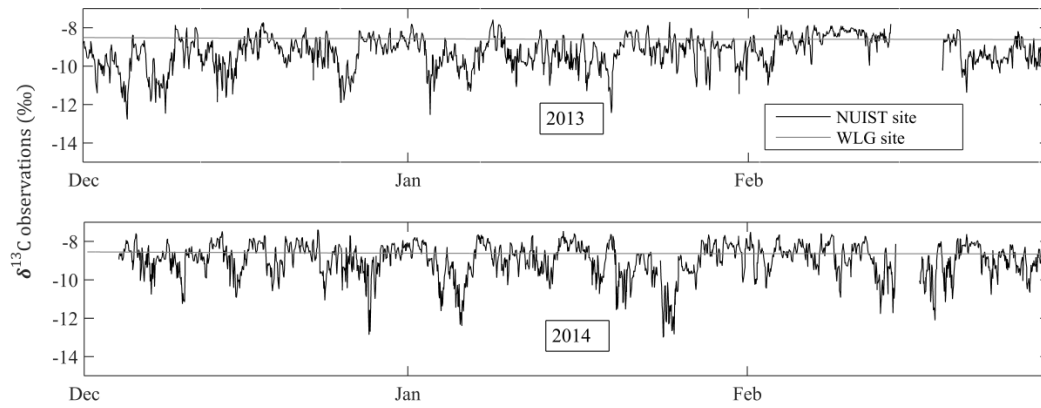

Figure S5.  $\delta^{13}\text{C}$  Comparison between NUIST and WLG sites in winter.

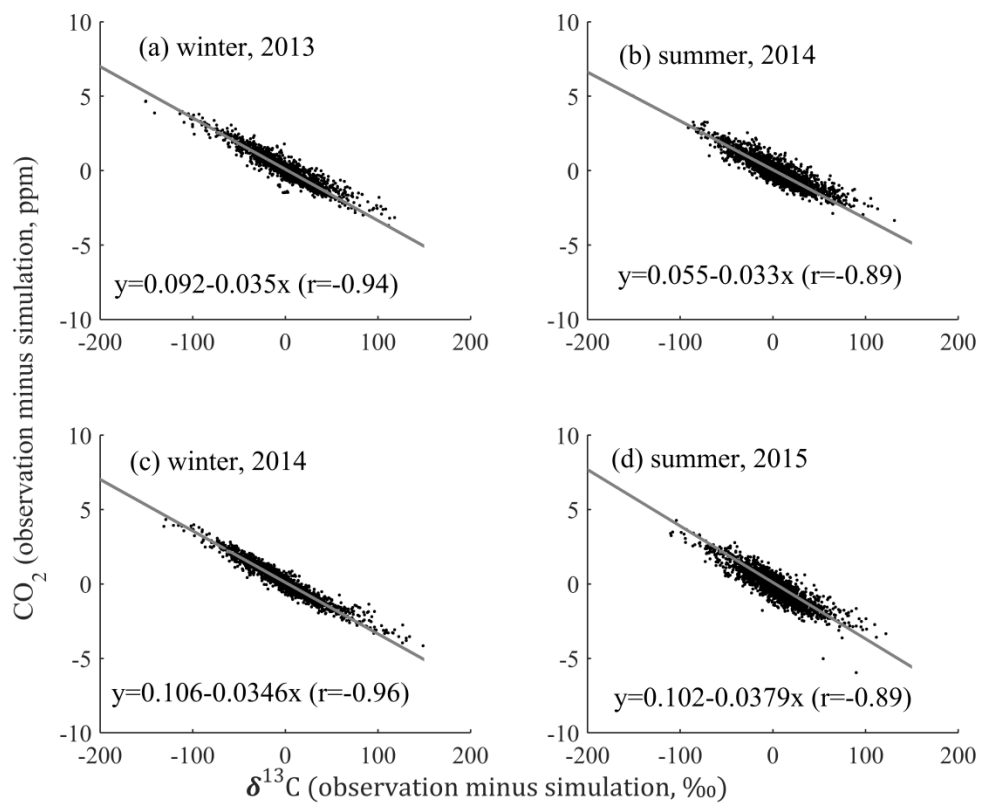

Figure S6. Relationship of observation minus simulation residual between  $\text{CO}_2$  and  $^{13}\text{CO}_2$  for (a) winter in 2013, (b) summer in 2014, (c) winter in 2014, and (d) summer in 2015.



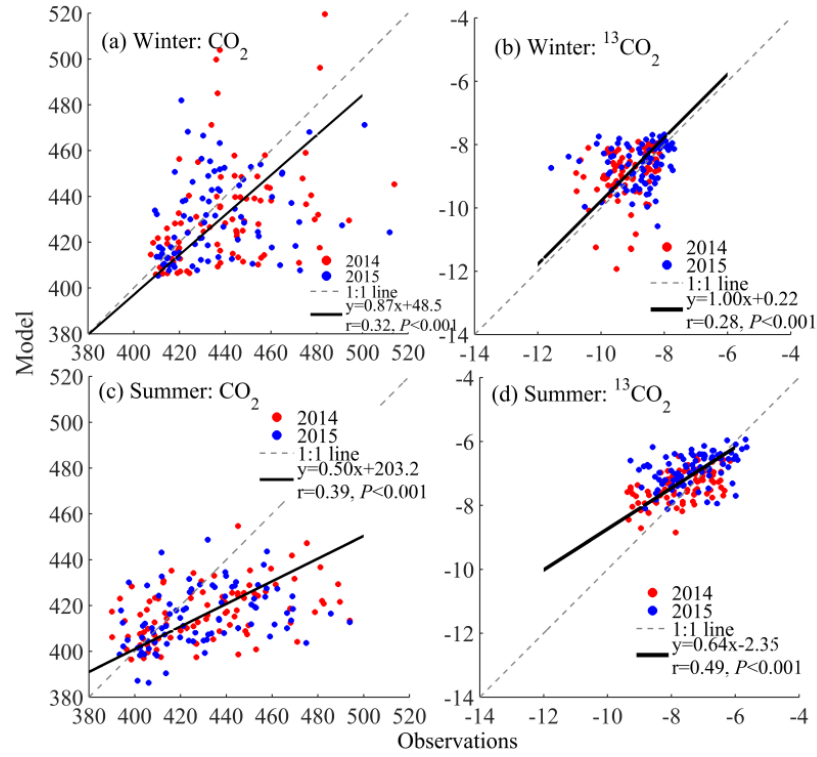

Figure S7. Scatter plots of observed versus modeled (a) winter time CO<sub>2</sub> mixing ratios, (b) winter time  $\delta^{13}\text{C}$ -CO<sub>2</sub>, (c) summer time CO<sub>2</sub>, and (d) summer time  $\delta^{13}\text{C}$ -CO<sub>2</sub> for both years, here these dots are daytime (10:00-16:00) averages.

Table S1. Difference of simulated monthly  $\delta^{13}\text{C}_{\text{ms}}$  between 2014 and 2015 for only anthropogenic sources.

|               | Jan  | Feb   | Mar   | Apr  | May   | Jun  | Jul  | Aug  | Sep   | Oct   | Nov   | Dec   |
|---------------|------|-------|-------|------|-------|------|------|------|-------|-------|-------|-------|
| Nighttime (‰) | 0.39 | -0.16 | -0.12 | 0.43 | -0.25 | 1.06 | 0.75 | 0.56 | -0.99 | -1.09 | 0.00  | -0.31 |
| All-day (‰)   | 0.23 | -0.14 | -0.17 | 0.35 | -0.25 | 0.32 | 0.67 | 0.20 | -0.94 | -0.95 | -0.07 | -0.22 |

Table S2. Comparisons between cement emission proportions and the simulated cement CO<sub>2</sub> enhancements proportions for different months in 2014 and 2015(note the superscript ‘a’ is ratio of cement to anthropogenic CO<sub>2</sub> emissions and ‘b’ is a ratio of cement to total CO<sub>2</sub> emissions, which contains biological and anthropogenic CO<sub>2</sub> flux).

| Proportions                                                                                   | Jan  | Feb  | Mar  | Apr   | May   | Jun   | Jul   | Aug   | Sep   | Oct  | Nov  | Dec  | Annual ave |
|-----------------------------------------------------------------------------------------------|------|------|------|-------|-------|-------|-------|-------|-------|------|------|------|------------|
| EDGAR anthropogenic<br>( $\times 10^3 \text{ nmol} \cdot \text{m}^{-2} \cdot \text{s}^{-1}$ ) | 4.56 | 4.85 | 4.13 | 4.01  | 3.54  | 3.39  | 3.15  | 3.37  | 3.77  | 3.90 | 4.32 | 4.41 | 3.95       |
| EDGAR cement<br>( $\times 10^3 \text{ nmol} \cdot \text{m}^{-2} \cdot \text{s}^{-1}$ )        | 0.28 | 0.31 | 0.28 | 0.29  | 0.28  | 0.29  | 0.28  | 0.28  | 0.29  | 0.28 | 0.29 | 0.28 | 0.29       |
| Cement emission proportion (%)                                                                | 6.21 | 6.46 | 6.85 | 7.29  | 7.99  | 8.61  | 8.98  | 8.38  | 7.76  | 7.26 | 6.77 | 6.41 | 7.34       |
| <sup>a</sup> Cement concentration<br>proportion 2014 (%)                                      | 8.01 | 6.78 | 9.25 | 12.25 | 13.07 | 16.85 | 14.40 | 13.37 | 8.88  | 6.17 | 6.68 | 5.60 | 10.11      |
| <sup>a</sup> Cement concentration<br>proportion 2015 (%)                                      | 6.59 | 8.10 | 9.19 | 10.86 | 13.68 | 13.16 | 11.30 | 11.23 | 11.79 | 9.76 | 6.92 | 6.77 | 9.95       |
| <sup>b</sup> Cement concentration<br>proportion 2014 (%)                                      | 7.59 | 6.71 | 8.72 | 9.77  | 10.20 | 12.87 | 10.32 | 11.07 | 6.85  | 5.40 | 6.57 | 5.31 | 9.95       |
| <sup>b</sup> Cement concentration<br>proportion 2015 (%)                                      | 6.48 | 7.66 | 8.39 | 9.95  | 13.68 | 12.22 | 10.66 | 8.49  | 9.80  | 8.59 | 6.76 | 6.72 | 9.95       |
